# Supplementary material for: Host Gender and Androgen Levels Regulate Gut Bacterial Taxa in Pigs Leading to Sex-Biased Serum Metabolite Profiles
Source: Front Microbiol. 2019 Jun 18;10:1359. doi: 10.3389/fmicb.2019.01359 (PMC6591444; doi:10.3389/fmicb.2019.01359)
Supplement: TABLE S6 — Metabolite modules of serum compounds via WGCNA method in the Duroc pig population. [file Table_6.XLSX]

## Sheet: Sheet2
Supporting information Table S6. Metabolite modules of serum compounds via WGCNA method in the Duroc pig population
RT/MZ value	Putative compounds	module
17.93_741.4706m/z	6-Keto-prostaglandin F1a	black
17.69_210.1250m/z	4-(methylnitrosamino)-1-(3-pyridyl)-1-butanol	black
17.77_123.0766m/z	L-Serine	black
17.70_263.1450m/z	Creatine	black
17.16_383.2168m/z	4-Hydroxydebrisoquine	black
17.25_337.2325m/z	12,13-DHOME	black
17.34_467.3465m/z	Vitamin K1 2,3-epoxide	black
16.79_731.5977m/z	Ubiquinol 8	black
18.16_207.0251m/z	4-O-Methylgallic acid	black
17.57_207.0279m/z	4-O-Methylgallic acid	black
18.77_807.0359m/z	CDP	black
17.34_727.5598m/z	20-HETE ethanolamide	black
17.89_210.1227m/z	4-(methylnitrosamino)-1-(3-pyridyl)-1-butanol	black
18.09_741.4715m/z	6-Keto-prostaglandin F1a	black
18.34_741.4765m/z	6-Keto-prostaglandin F1a	black
18.19_281.0622m/z	Ticlopidine S-oxide	black
17.80_571.3986m/z	2-Octenoylcarnitine	brown
17.65_715.3917m/z	(S)-Laudanosine	brown
18.53_493.3020m/z	3-Hydroxydodecanedioic acid	brown
9.29_251.1349m/z	L-isoleucyl-L-proline	brown
17.19_493.3033m/z	3-Hydroxydodecanedioic acid	brown
8.63_275.1497m/z	1-Methylnicotinamide	brown
17.66_527.3822m/z	N-Desmethylvenlafaxine	brown
18.29_469.2786m/z	3,17-Androstanediol glucuronide	brown
18.67_306.2077m/z	16b-Hydroxyestradiol	brown
18.47_329.1535m/z	N2,N2-Dimethylguanosine	brown
10.47_383.1977m/z	5-Methoxytryptophol	brown
18.17_483.2645m/z	11-beta-hydroxyandrosterone-3-glucuronide	brown
18.74_581.3997m/z	D-617	brown
17.28_233.1030m/z	Alpha-ketoisovaleric acid	brown
18.29_319.2256m/z	5-HEPE	brown
17.96_245.1011m/z	Niacinamide	brown
6.28_219.0478m/z	Galactonic acid	brown
18.88_152.0544m/z	Malic acid	brown
18.28_437.2197m/z	N-Acetylserotonin	brown
17.20_262.1316m/z	Methylmalonylcarnitine	brown
18.13_273.0862m/z	Hypoxanthine	brown
19.06_537.4516m/z	B-Carotene	brown
18.86_701.4181m/z	Prostaglandin E3	brown
10.36_301.1334m/z	Promazine 5-sulfoxide	brown
2.93_177.1027m/z	Serotonin	brown
17.86_435.2542m/z	N-Desmethylaminopyrine	brown
16.95_179.0704m/z	4-Methoxycinnamic acid	brown
18.18_573.3992m/z	Androstenedione	brown
17.78_222.1224m/z	D-Tryptophan	brown
18.11_497.2871m/z	APGPR Enterostatin	brown
17.57_527.3574m/z	Hydroxyvalerylcarnitine	brown
18.49_729.4594m/z	Tetrahydrocortisone	brown
17.45_203.1257m/z	Sebacic acid	brown
18.76_517.3685m/z	Tetradecanedioic acid	brown
18.47_367.1917m/z	11-Dehydrocorticosterone	cyan
15.75_356.1844m/z	Nicotine glucuronide	cyan
13.25_326.1569m/z	Pimelylcarnitine	cyan
15.75_395.2145m/z	Metanephrine	cyan
5.08_283.1066m/z	1-Methylinosine	cyan
4.98_283.1061m/z	1-Methylinosine	cyan
15.75_315.1551m/z	Phenethylamine glucuronide	cyan
16.05_339.1769m/z	1-Methylhistidine	cyan
13.25_369.1606m/z	N-Desmethyleletriptan	cyan
18.29_486.1104m/z	Peonidin-3-glucoside	cyan
8.56_285.0942m/z	p-Cresol glucuronide	cyan
9.55_408.1589m/z	5-Hydroxyfluvastatin	cyan
10.44_281.2477m/z	Elaidic acid	cyan
8.82_277.2167m/z	Alpha-dimorphecolic	cyan
9.55_347.2197m/z	5a-Tetrahydrocortisol	cyan
9.55_279.2323m/z	9E,11E-Octadecadienoic acid	cyan
3.76_474.2871m/z	Sulfolithocholic acid	green
17.99_334.2160n	Prostaglandin J2	green
9.69_441.3649m/z	Linoleyl carnitine	green
4.41_399.2532m/z	Ecgonine methyl ester	green
7.59_271.0783m/z	Homocysteine	green
7.28_346.2880m/z	Stanozolol	green
5.98_313.1545m/z	Phenylalanylphenylalanine	green
6.92_365.1678m/z	Galactitol	green
4.96_646.3786n	Gypsogenin 3-O-b-D-glucuronide	green
3.47_177.1026m/z	Serotonin	green
7.59_299.0750m/z	Benzoyl glucuronide (Benzoic acid)	green
3.86_412.1911n	17-Hydroxypregnenolone sulfate	green
4.61_507.2608m/z	11-Hydroxyprogesterone 11-glucuronide	green
4.40_481.2569m/z	Anserine	green
6.82_245.0796m/z	Uridine	green
4.61_456.2535n	Sulfolithocholic acid	green
3.22_177.1028m/z	Serotonin	green
4.29_355.2257m/z	16-a-Hydroxypregnenolone	green
3.63_323.1628m/z	2-Methoxyestrone	green
3.99_488.2998m/z	Glycocholic acid	green
17.13_367.2073m/z	20-Carboxyleukotriene B4	green
4.30_395.2181m/z	Metanephrine	green
8.65_347.1655m/z	2-Oxoarginine	green
6.55_321.2488m/z	N(6)-Methyllysine	greenyellow
6.54_487.2351m/z	Dehydroepiandrosterone 3-glucuronide	greenyellow
6.54_357.2725m/z	Docosatrienoic acid	greenyellow
7.79_321.2457m/z	11,12-EpETrE	greenyellow
4.71_567.3156m/z	Deoxycholic acid 3-glucuronide	greenyellow
5.29_391.2842m/z	Deoxycholic acid	greenyellow
5.67_389.2692m/z	Ursocholic acid	greenyellow
6.35_391.2849m/z	Deoxycholic acid	greenyellow
5.50_391.2850m/z	Deoxycholic acid	greenyellow
4.61_465.2492m/z	3-alpha-hydroxy-5-alpha-androstane-17-one 3-D-glucuronide	grey60
5.13_465.2462m/z	3-alpha-hydroxy-5-alpha-androstane-17-one 3-D-glucuronide	grey60
6.66_449.2542m/z	3,17-Androstanediol glucuronide	grey60
4.88_369.1737m/z	Androsterone sulfate	grey60
4.78_367.1578m/z	Testosterone sulfate	grey60
18.88_327.0714m/z	Acetylcysteine	lightcyan
10.03_331.0964m/z	Methionine sulfoxide	lightcyan
11.27_239.0668m/z	Ribothymidine	lightcyan
11.35_239.0668m/z	Ribothymidine	lightcyan
10.61_239.0664m/z	Ribothymidine	lightcyan
5.23_227.1287m/z	3-Hydroxydodecanedioic acid	lightcyan
5.09_305.0814m/z	S-4'-Hydroxywarfarin	lightcyan
11.79_150.9959m/z	3-Sulfinoalanine	magenta
13.98_391.2836m/z	Deoxycholic acid	magenta
10.55_711.7299m/z	Triiodothyronine sulfate	magenta
13.36_325.1838m/z	11-Dehydrocorticosterone	magenta
10.81_711.7293m/z	Triiodothyronine sulfate	magenta
6.69_447.9696m/z	dCTP	magenta
10.65_456.7564m/z	Lanthanum	magenta
10.70_631.7752m/z	Liothyronine	magenta
10.29_377.2716m/z	2-Arachidonylglycerol	magenta
13.70_349.2412m/z	Beta-Cortol	magenta
5.60_465.3036n	Glycocholic acid	midnightblue
5.80_236.1516m/z	3-Hydroxysebacic acid	midnightblue
19.08_202.0730m/z	4-O-Methylgallic acid	midnightblue
6.16_287.1996m/z	Androstenedione	midnightblue
6.16_375.2506m/z	Calcitroic acid	midnightblue
4.66_464.3010m/z	Glycocholic acid	midnightblue
5.19_407.2798m/z	Ursocholic acid	midnightblue
17.70_523.9943m/z	Guanosine triphosphate	pink
2.61_207.1128m/z	3-Indolepropionic acid	pink
17.66_185.1007m/z	Glycerol	pink
3.42_411.1859m/z	17-Hydroxypregnenolone sulfate	pink
2.77_207.0869m/z	Carnosine	pink
3.32_367.1600m/z	Testosterone sulfate	pink
3.43_471.2441m/z	Ursodeoxycholic acid 3-sulfate	pink
3.98_587.3257m/z	(23S)-23,25-dihdroxy-24-oxovitamine D3 23-(beta-glucuronide)	pink
3.81_455.2491m/z	Sulfolithocholic acid	pink
4.09_645.3654m/z	Gypsogenin 3-O-b-D-glucuronide	pink
18.85_335.2172m/z	15,16-DiHODE	purple
6.38_311.2199m/z	9,12,13-TriHOME	purple
6.70_309.2061m/z	12(13)Ep-9-KODE	purple
2.78_258.0066m/z	DOPA sulfate	purple
4.84_329.2329m/z	9,12,13-TriHOME	purple
3.57_121.0300m/z	4-Hydroxybenzaldehyde	purple
6.25_311.2195m/z	9,12,13-TriHOME	purple
6.80_310.2126n	12(13)Ep-9-KODE	purple
7.15_295.2270m/z	12,13-DHOME	purple
5.90_464.2775m/z	SR 49498	red
5.81_504.2420m/z	Glucosylgalactosyl hydroxylysine	red
5.81_321.2464m/z	N(6)-Methyllysine	red
5.81_472.2996m/z	Chenodeoxycholic acid glycine conjugate	red
6.77_391.2758m/z	Dodecanedioylcarnitine	red
5.81_485.2197m/z	6-Dehydrotestosterone glucuronide	red
5.37_464.2778m/z	SR 49498	red
12.70_88.9879m/z	Carbon dioxide	red
19.06_202.0708m/z	4-O-Methylgallic acid	red
5.85_389.2664m/z	Ursocholic acid	red
5.48_448.3057m/z	Chenodeoxycholic acid glycine conjugate	red
4.94_498.2883m/z	Tauroursodeoxycholic acid	red
4.78_446.2900m/z	Glycocholic acid	red
14.11_554.2615m/z	Enkephalin L	red
4.28_498.2873m/z	Tauroursodeoxycholic acid	red
4.97_446.2899m/z	Glycocholic acid	red
4.53_496.2732m/z	Taurocholic acid	red
4.86_448.3064m/z	Chenodeoxycholic acid glycine conjugate	red
4.69_448.3059m/z	Chenodeoxycholic acid glycine conjugate	red
4.29_514.2831m/z	Taurocholic acid	red
4.45_498.2887m/z	Tauroursodeoxycholic acid	red
5.45_965.5041m/z	Soyasapogenol B 3-O-[a-L-rhamnosyl-(1->4)-b-D-galactosyl-(1->4)-b-D-glucuronide]	tan
9.01_295.2182m/z	2-ethylidene-1,5-dimethyl-3,3-diphenylpyrrolidine	tan
9.01_369.1511m/z	Vanylglycol	tan
1.03_554.2608m/z	Enkephalin L	tan
6.40_378.2403m/z	Sphingosine 1-phosphate	tan
6.98_311.2222m/z	9,12,13-TriHOME	tan
6.55_309.2060m/z	12(13)Ep-9-KODE	tan
6.98_333.2033m/z	Thromboxane A2	tan
18.36_293.1734m/z	Glutarylcarnitine	turquoise
17.06_512.4986m/z	Cer(d18:0/14:0)	turquoise
3.00_167.0346n	Taurocyamine	turquoise
18.16_210.1247m/z	4-(methylnitrosamino)-1-(3-pyridyl)-1-butanol	turquoise
4.66_263.1230m/z	Hydroxyproline	turquoise
18.04_571.3946m/z	2-Octenoylcarnitine	turquoise
2.14_207.0777m/z	Kynurenic acid	turquoise
18.91_206.0797m/z	Indolelactic acid	turquoise
18.61_435.3241m/z	25-Hydroxyvitamin D2	turquoise
18.51_568.5613m/z	Cer(d18:0/18:0)	turquoise
18.59_333.2408m/z	16-a-Hydroxypregnenolone	turquoise
2.57_177.1033m/z	Serotonin	turquoise
1.71_447.1987m/z	Estrone glucuronide	turquoise
18.59_555.3784m/z	2-ethylidene-1,5-dimethyl-3,3-diphenylpyrrolidine	turquoise
18.49_641.4077m/z	QH2	turquoise
3.63_368.1653n	Testosterone sulfate	turquoise
4.05_491.2014m/z	N5-Formyl-THF	turquoise
10.80_341.1236m/z	3,4-Dihydroxyphenylglycol	turquoise
18.11_571.3964m/z	2-Octenoylcarnitine	turquoise
4.05_485.1912m/z	Thymidine	turquoise
17.13_179.0691m/z	4-Methoxycinnamic acid	turquoise
17.89_439.2543m/z	ritalinic acid	turquoise
18.91_346.2882m/z	Stanozolol	turquoise
19.09_486.1114m/z	Peonidin-3-glucoside	turquoise
19.03_251.1304m/z	Ubiquinone-1	turquoise
3.60_245.1261m/z	Deoxycytidine	turquoise
0.83_132.0663m/z	Hydroxyproline	turquoise
18.16_377.3057m/z	Lithocholic acid	turquoise
18.95_581.3993m/z	D-617	turquoise
17.44_383.2209m/z	4-Hydroxydebrisoquine	turquoise
13.98_363.1590m/z	o-Tyrosine	turquoise
6.82_362.8997m/z	Tantalum	turquoise
6.82_262.1309m/z	Methylmalonylcarnitine	turquoise
18.45_293.1510m/z	Estrone	turquoise
17.59_331.0971m/z	Methionine sulfoxide	turquoise
3.18_363.1558m/z	o-Tyrosine	turquoise
11.69_311.2114m/z	E-10-Hydroxyamitriptyline	turquoise
4.05_175.0952m/z	Suberic acid	turquoise
6.80_343.2557m/z	10-Nitrolinoleic acid	turquoise
0.78_169.0480m/z	Homogentisic acid	turquoise
10.38_278.0351m/z	DOPA sulfate	turquoise
17.18_383.2348m/z	6-O-Desmethyldonepezil	turquoise
3.15_295.1170m/z	L-Glutamic acid	turquoise
5.68_266.1631m/z	Histidylproline diketopiperazine	turquoise
18.97_333.2098m/z	11b-Hydroxyprogesterone	turquoise
7.50_295.1114m/z	L-Glutamic acid	turquoise
18.78_167.0687m/z	3,4-Dihydroxyphenylacetone	turquoise
3.05_356.1849m/z	Nicotine glucuronide	turquoise
18.91_695.5765m/z	Anandamide	turquoise
18.88_251.0393m/z	Taurine	turquoise
2.60_291.0710m/z	Inosine	turquoise
19.06_167.0690m/z	3,4-Dihydroxyphenylacetone	turquoise
4.42_179.0537m/z	Gluconolactone	turquoise
4.40_479.2392m/z	Sulfolithocholic acid	turquoise
18.94_377.2729m/z	Dimethyltryptamine	turquoise
17.73_449.2131m/z	Estradiol-17alpha 3-D-glucuronoside	turquoise
18.34_469.2851m/z	3,17-Androstanediol glucuronide	turquoise
7.07_346.2875m/z	Stanozolol	turquoise
2.07_231.0745m/z	L-Kynurenine	turquoise
18.45_493.3045m/z	3-Hydroxydodecanedioic acid	turquoise
17.89_467.3520m/z	Vitamin K1 2,3-epoxide	turquoise
18.51_333.2420m/z	16-a-Hydroxypregnenolone	turquoise
18.48_377.3034m/z	Lithocholic acid	turquoise
18.20_391.2478m/z	Beta-Cortol	turquoise
17.49_383.2010m/z	5-Methoxytryptophol	turquoise
4.31_175.0967m/z	Suberic acid	turquoise
2.01_276.1342m/z	Alanyltryptophan	turquoise
19.00_439.2573m/z	ritalinic acid	turquoise
18.69_377.2719m/z	Dimethyltryptamine	turquoise
18.41_347.2241m/z	Corticosterone	turquoise
3.99_469.2326m/z	SR 49498	turquoise
4.40_474.2834m/z	Sulfolithocholic acid	turquoise
1.13_123.0451m/z	4-Hydroxybenzaldehyde	turquoise
18.76_237.1558m/z	L-2,4-diaminobutyric acid	turquoise
17.45_439.2617m/z	ritalinic acid	turquoise
2.57_284.1986m/z	N-Dealkylatedtolterodine	turquoise
3.99_271.1062m/z	6-Hydroxymelatonin	turquoise
18.80_437.2362m/z	3-Hydroxysebacic acid	turquoise
4.05_536.2634m/z	Sulfolithocholylglycine	turquoise
6.05_307.0888m/z	3-Hydroxyanthranilic acid	turquoise
6.41_143.1077m/z	4-ene-Valproic acid	turquoise
16.75_375.2243m/z	(S)-Laudanosine	turquoise
17.60_469.2783m/z	3,17-Androstanediol glucuronide	turquoise
1.61_135.0289m/z	Malic acid	turquoise
3.97_472.2486n	Ursodeoxycholic acid 3-sulfate	turquoise
2.60_252.1123n	3'-Hydroxyhexobarbital	turquoise
9.88_184.0626m/z	4-Pyridoxic acid	turquoise
17.57_367.2084m/z	20-Carboxyleukotriene B4	turquoise
1.70_276.1341m/z	Alanyltryptophan	turquoise
3.20_525.4611m/z	Retinyl palmitate	turquoise
16.82_383.2306m/z	6-O-Desmethyldonepezil	turquoise
1.65_153.0553m/z	4-Hydroxy-3-methylbenzoic acid	turquoise
17.91_183.0800m/z	Methionine sulfoxide	turquoise
0.78_173.0200m/z	Glycerol 3-phosphate	turquoise
5.70_409.1860m/z	D-Tryptophan	turquoise
16.88_665.4819m/z	16-a-Hydroxypregnenolone	turquoise
11.93_185.0706m/z	Taurocyamine	turquoise
2.67_303.1331m/z	Dopamine quinone	turquoise
9.89_335.0950m/z	8-Hydroxyguanine	turquoise
18.85_695.5791m/z	Anandamide	turquoise
0.73_110.0612m/z	4-Aminophenol	turquoise
3.89_490.2846m/z	Ursodeoxycholic acid 3-sulfate	turquoise
4.31_440.2130m/z	8-Hydroxycarvedilol	turquoise
19.07_275.1512m/z	1-Methylnicotinamide	turquoise
0.78_184.0616m/z	4-Pyridoxic acid	turquoise
9.83_383.1242m/z	5-Hydroxyindoleacetic acid	turquoise
2.01_127.0399m/z	1,2,3-trihydroxybenzene	turquoise
4.74_629.3310m/z	(23S)-23,25-dihdroxy-24-oxovitamine D3 23-(beta-glucuronide)	turquoise
0.73_207.0412m/z	Lanthionine ketimine	turquoise
9.96_409.1877m/z	D-Tryptophan	turquoise
0.73_156.0646m/z	4-Hydroxybenzoic acid	turquoise
12.19_407.3279m/z	Vitamin D3	turquoise
16.90_383.1979m/z	5-Methoxytryptophol	turquoise
18.35_237.1577m/z	ritalinic acid	turquoise
18.69_275.1477m/z	1-Methylnicotinamide	turquoise
3.17_157.1234m/z	4-Hydroxynonenal	turquoise
19.00_771.5676m/z	3-Hydroxy-cis-5-tetradecenoylcarnitine	turquoise
18.83_167.0677m/z	4-Hydroxycyclohexylcarboxylic acid	turquoise
18.58_799.6699m/z	Thyroxine	turquoise
3.99_463.2271m/z	6-Dehydrotestosterone glucuronide	turquoise
3.06_265.1199m/z	Acetyl-N-formyl-5-methoxykynurenamine	turquoise
18.34_637.4528m/z	5-HEPE	turquoise
18.37_825.6735m/z	25-Hydroxyvitamin D2	turquoise
18.36_729.4579m/z	Tetrahydrocortisone	turquoise
2.76_117.0487m/z	Allyl isothiocyanate	turquoise
2.22_180.0779m/z	acetylisoniazid	turquoise
17.29_179.0714m/z	4-Methoxycinnamic acid	turquoise
19.07_627.4575m/z	9-Decenoylcarnitine	turquoise
18.41_287.1628m/z	4-Hydroxyestrone	turquoise
17.84_651.4620m/z	10-Nitrolinoleic acid	turquoise
17.29_294.1884m/z	E-10-Hydroxyamitriptyline	turquoise
17.53_407.2142m/z	Tryptophanamide	turquoise
16.67_179.0688m/z	4-Methoxycinnamic acid	turquoise
18.98_302.2293m/z	Nonanoylcarnitine	turquoise
19.07_302.2293m/z	Nonanoylcarnitine	turquoise
4.36_453.2240m/z	Carnosine	turquoise
18.16_294.1668m/z	Saccharopine	turquoise
18.17_204.1232m/z	L-Acetylcarnitine	turquoise
4.78_283.0447m/z	O-Phosphoethanolamine	turquoise
3.36_309.1468m/z	4-Hydroxyestrone	turquoise
18.19_363.2540m/z	19,20-DiHDPA	turquoise
18.78_695.5783m/z	Anandamide	turquoise
18.29_483.2473m/z	Tetrahydrobiopterin	turquoise
4.77_315.1386m/z	1-Methylguanosine	turquoise
15.74_573.3973m/z	Androstenedione	turquoise
9.06_251.1369m/z	L-isoleucyl-L-proline	turquoise
14.31_363.1585m/z	o-Tyrosine	turquoise
17.95_123.0656m/z	D-Threitol	turquoise
7.04_239.1234m/z	N-Acetyl-D-glucosamine	turquoise
18.59_435.3252m/z	25-Hydroxyvitamin D2	turquoise
19.09_536.4356n	B-Carotene	turquoise
4.05_557.2095m/z	Isovalerylglucuronide	turquoise
18.21_165.0875m/z	L-Glutamic acid	turquoise
6.45_221.1403m/z	Tryptophanamide	turquoise
18.37_486.1104m/z	Peonidin-3-glucoside	turquoise
15.77_397.2026m/z	Pregnenolone sulfate	turquoise
7.48_516.1310n	3,4-Di-O-caffeoylquinic acid	turquoise
0.77_177.0149m/z	Gentisic acid	turquoise
18.44_641.4077m/z	QH2	turquoise
1.21_229.1448m/z	Traumatic acid	turquoise
18.81_363.2506m/z	19,20-DiHDPA	turquoise
1.91_151.0490m/z	Dihydrothymine	turquoise
3.57_347.1548m/z	Escitalopram	turquoise
17.42_407.1981m/z	3-Indolebutyric acid	turquoise
18.04_377.3039m/z	Lithocholic acid	turquoise
18.18_287.1645m/z	4-Hydroxyestrone	turquoise
4.83_511.2720m/z	CGP72383	turquoise
4.57_241.1078m/z	3-(3,4,5-Trimethoxyphenyl)propanoic acid	turquoise
13.99_221.1292m/z	3-Indolebutyric acid	turquoise
18.31_189.1137m/z	Azelaic acid	turquoise
5.10_559.3268m/z	E-10-Hydroxynortriptyline	turquoise
19.04_713.5234m/z	13,14-Dihydro PGE1	turquoise
17.47_390.2962m/z	Cervonoyl ethanolamide	turquoise
5.04_431.2434m/z	Propenoylcarnitine	turquoise
16.07_573.3962m/z	Androstenedione	turquoise
16.58_377.1953m/z	18-Oxocortisol	turquoise
17.81_661.4499m/z	17-Hydroxyprogesterone	turquoise
18.56_377.2720m/z	Dimethyltryptamine	turquoise
1.77_229.1444m/z	Traumatic acid	turquoise
4.06_271.1199m/z	4-Hydroxyketamine	turquoise
17.17_179.0705m/z	4-Methoxycinnamic acid	turquoise
3.49_355.1867m/z	11b-Hydroxyprogesterone	turquoise
9.28_455.2494m/z	Sulfolithocholic acid	turquoise
0.85_161.0688n	Aminoadipic acid	turquoise
5.33_357.2754m/z	Lithocholic acid	turquoise
0.79_147.0531n	L-Glutamic acid	turquoise
3.64_284.0900n	p-Cresol glucuronide	turquoise
10.11_239.0648m/z	Ribothymidine	turquoise
0.99_187.1086m/z	N6-Acetyl-L-lysine	turquoise
6.90_112.9863m/z	trifluoroacetic acid	turquoise
1.84_267.0730m/z	Inosine	turquoise
2.98_225.0631m/z	5-Acetylamino-6-formylamino-3-methyluracil	turquoise
10.31_341.1931m/z	2,3-Dinor-6-keto-prostaglandin F1 a	turquoise
7.49_224.0689m/z	Cytarabine	turquoise
1.17_151.0263m/z	Xanthine	turquoise
2.04_554.2621m/z	Enkephalin L	turquoise
8.07_554.2642m/z	Enkephalin L	turquoise
11.60_443.2453m/z	Retinyl beta-glucuronide	turquoise
5.43_255.1595m/z	3-Hydroxytetradecanedioic acid	turquoise
0.78_109.0404m/z	Dihydrothymine	turquoise
1.87_186.0218m/z	Xanthurenic acid	turquoise
3.66_269.0448m/z	Orotidine	turquoise
3.04_554.2600m/z	Enkephalin L	turquoise
7.70_281.2476m/z	Elaidic acid	turquoise
12.09_554.2605m/z	Enkephalin L	turquoise
6.31_415.3176m/z	24,25-Dihydroxyvitamin D	turquoise
14.01_239.0663m/z	Ribothymidine	turquoise
0.77_941.5009m/z	Soyasapogenol B 3-O-[a-L-rhamnosyl-(1->4)-b-D-galactosyl-(1->4)-b-D-glucuronide]	turquoise
3.32_187.0061m/z	p-Cresol sulfate	turquoise
0.79_242.0794m/z	Cytarabine	turquoise
8.59_224.0690m/z	Cytarabine	turquoise
10.32_431.0856m/z	17-Beta-Estradiol-3,17-beta-sulfate	turquoise
3.35_253.0500m/z	Dihydrogenistein	turquoise
5.38_329.2330m/z	9,12,13-TriHOME	turquoise
7.17_338.1949m/z	N-Desmethyltamoxifen	turquoise
6.15_459.2009m/z	4-Hydroxyandrostenedione glucuronide	turquoise
7.04_239.0665m/z	Ribothymidine	turquoise
2.97_258.0073m/z	DOPA sulfate	turquoise
8.34_283.2640m/z	Stearic acid	turquoise
0.88_173.0929m/z	N-Acetylornithine	turquoise
0.77_131.0462m/z	Glycyl-glycine	turquoise
3.49_187.0058m/z	p-Cresol sulfate	turquoise
11.09_554.2616m/z	Enkephalin L	turquoise
1.70_276.0165m/z	DOPA sulfate	turquoise
9.08_554.2611m/z	Enkephalin L	turquoise
3.50_264.9545m/z	Glyceric acid 1,3-biphosphate	turquoise
7.03_112.9860m/z	trifluoroacetic acid	turquoise
5.25_359.1889m/z	18-Hydroxycortisol	turquoise
3.85_245.0923m/z	Acetyl-N-formyl-5-methoxykynurenamine	turquoise
0.80_131.0823m/z	Ornithine	turquoise
0.79_116.0357m/z	Adenine	turquoise
2.65_310.0010m/z	3'-Hydroxydiclofenac	turquoise
7.03_279.2320m/z	9E,11E-Octadecadienoic acid	turquoise
1.87_276.0166m/z	DOPA sulfate	turquoise
0.72_225.0976m/z	Carnosine	turquoise
5.58_257.1751m/z	Tetradecanedioic acid	turquoise
2.89_624.2982m/z	11-trans-Leukotriene C4	turquoise
0.77_104.0361m/z	L-Serine	turquoise
4.01_187.0974m/z	Azelaic acid	turquoise
10.08_554.2618m/z	Enkephalin L	turquoise
0.83_225.0490m/z	Uridine	turquoise
9.86_775.6011m/z	Coenzyme Q9	turquoise
1.70_230.0115m/z	Norepinephrine sulfate	turquoise
2.98_186.0557m/z	Indolelactic acid	turquoise
1.16_291.9932m/z	3'-Hydroxydiclofenac	turquoise
1.14_89.0248m/z	Hydroxypropionic acid	turquoise
5.36_391.2843m/z	Deoxycholic acid	turquoise
6.92_277.1440m/z	Alpha-CEHC	turquoise
1.87_230.0117m/z	Norepinephrine sulfate	turquoise
0.85_191.0555m/z	1,3,7-Trimethyluric acid	turquoise
2.98_203.0824m/z	D-Tryptophan	turquoise
2.97_109.0296m/z	Pyrocatechol	turquoise
8.69_301.2169m/z	11,12-EpETrE	turquoise
0.83_135.0297m/z	Threonic acid	turquoise
1.42_163.0397m/z	3-(3-hydroxyphenyl)-3-hydroxypropanoic acid	turquoise
3.56_74.0255m/z	Glycine	turquoise
0.78_215.1141m/z	N-a-Acetyl-L-arginine	turquoise
0.74_244.0283m/z	Epinephrine sulfate	turquoise
4.04_541.2647m/z	Cortolone-3-glucuronide	turquoise
0.83_296.0842m/z	5'-Methylthioadenosine	turquoise
3.11_338.0883m/z	5-Hydroxy-6-methoxyindole glucuronide	turquoise
0.77_658.6581m/z	Cer(d18:0/26:1(17Z))	turquoise
3.32_338.0876m/z	5-Hydroxy-6-methoxyindole glucuronide	turquoise
5.85_459.2016m/z	4-Hydroxyandrostenedione glucuronide	turquoise
3.37_178.0507m/z	L-Dopa	turquoise
4.96_375.1845m/z	18-Oxocortisol	turquoise
0.83_336.1409m/z	S-Adenosylmethioninamine	turquoise
2.65_164.0716m/z	Normetanephrine	turquoise
7.58_571.2887m/z	D-Urobilinogen	turquoise
1.01_116.0718m/z	Norvaline	turquoise
2.59_241.0821m/z	Thymidine	turquoise
0.73_246.9437m/z	Glyceric acid 1,3-biphosphate	turquoise
5.70_257.1755m/z	Tetradecanedioic acid	turquoise
0.84_280.1023m/z	1-Methyladenosine	turquoise
2.65_103.0555m/z	4-Ethylphenol	turquoise
10.33_255.2322m/z	Palmitic acid	turquoise
0.81_199.9682m/z	Cysteine-S-sulfate	turquoise
0.85_341.1078m/z	Isomaltose	turquoise
4.01_297.0974m/z	2-Phenylethanol glucuronide	turquoise
0.80_195.0506m/z	Galactonic acid	turquoise
7.47_255.2320m/z	Palmitic acid	turquoise
4.01_125.0971m/z	Caprylic acid	turquoise
11.43_283.2640m/z	Stearic acid	turquoise
9.34_303.2325m/z	15(S)-Hydroxyeicosatrienoic acid	turquoise
0.71_187.1082m/z	N6-Acetyl-L-lysine	turquoise
0.80_152.9951m/z	Glycerol 3-phosphate	turquoise
0.80_102.0562m/z	Gamma-Aminobutyric acid	turquoise
0.71_293.1305m/z	Phenylalanylphenylalanine	turquoise
2.64_258.0077m/z	DOPA sulfate	turquoise
1.87_360.0981m/z	Omeprazole sulfone	turquoise
1.30_243.0613m/z	Uridine	turquoise
3.37_134.0608m/z	Dopamine	turquoise
3.33_129.0557m/z	Mevalonic acid	turquoise
3.63_113.0245m/z	Glutaric acid	turquoise
0.78_127.0510m/z	L-Glutamine	turquoise
3.64_107.0504m/z	o-Cresol	turquoise
3.64_173.0817m/z	Suberic acid	turquoise
2.98_74.0255m/z	Glycine	turquoise
3.14_336.0718m/z	3-Indole carboxylic acid glucuronide	turquoise
3.41_230.0118m/z	Norepinephrine sulfate	turquoise
0.78_393.1142m/z	O-Deethylated candesartan	turquoise
0.84_274.1031m/z	Gamma-Glutamylglutamine	turquoise
3.15_175.0234m/z	D-Glucuronic acid	turquoise
13.21_377.2721m/z	2-Arachidonylglycerol	turquoise
1.42_180.0664m/z	o-Tyrosine	turquoise
3.14_160.0403m/z	Hippuric acid	turquoise
3.50_129.0556m/z	Mevalonic acid	turquoise
4.99_229.1440m/z	Dodecanedioic acid	turquoise
5.70_377.2687m/z	2-Arachidonylglycerol	turquoise
0.80_130.0536m/z	1-Methyladenine	turquoise
3.64_187.0070m/z	p-Cresol sulfate	turquoise
10.32_403.1626m/z	8-Hydroxycarvedilol	turquoise
3.02_406.0250m/z	Thiamine pyrophosphate	turquoise
7.44_313.2379m/z	12,13-DHOME	turquoise
8.55_325.1839m/z	11-Dehydrocorticosterone	turquoise
11.93_351.2208m/z	6-Keto-prostaglandin F1a	turquoise
4.35_201.1128m/z	Sebacic acid	turquoise
4.09_121.0658m/z	4-Ethylphenol	turquoise
0.73_154.0618m/z	2-Oxoarginine	turquoise
0.97_243.0614m/z	Uridine	turquoise
3.56_192.0662m/z	3-Methoxytyrosine	turquoise
2.98_181.0506m/z	3-(3-hydroxyphenyl)-3-hydroxypropanoic acid	turquoise
1.70_130.0871m/z	D-Leucine	turquoise
2.98_159.0927m/z	Nicotine-1'-N-oxide	turquoise
1.12_135.0309m/z	Threonic acid	turquoise
3.27_212.0018m/z	Indoxyl sulfate	turquoise
2.65_147.0451m/z	3,4-Dihydroxyphenylacetone	turquoise
8.59_283.2636m/z	Stearic acid	turquoise
1.25_128.0352m/z	L-Glutamic acid	turquoise
3.42_212.0016m/z	Indoxyl sulfate	turquoise
0.78_124.0072m/z	Taurine	turquoise
3.63_175.0244m/z	D-Glucuronic acid	turquoise
3.87_204.0660m/z	N-Acetyl-L-tyrosine	turquoise
1.87_130.0873m/z	D-Leucine	turquoise
0.75_112.9860m/z	trifluoroacetic acid	turquoise
